# Supplementary material
Source: PubMed Central journal article supplement (PMC3042242)

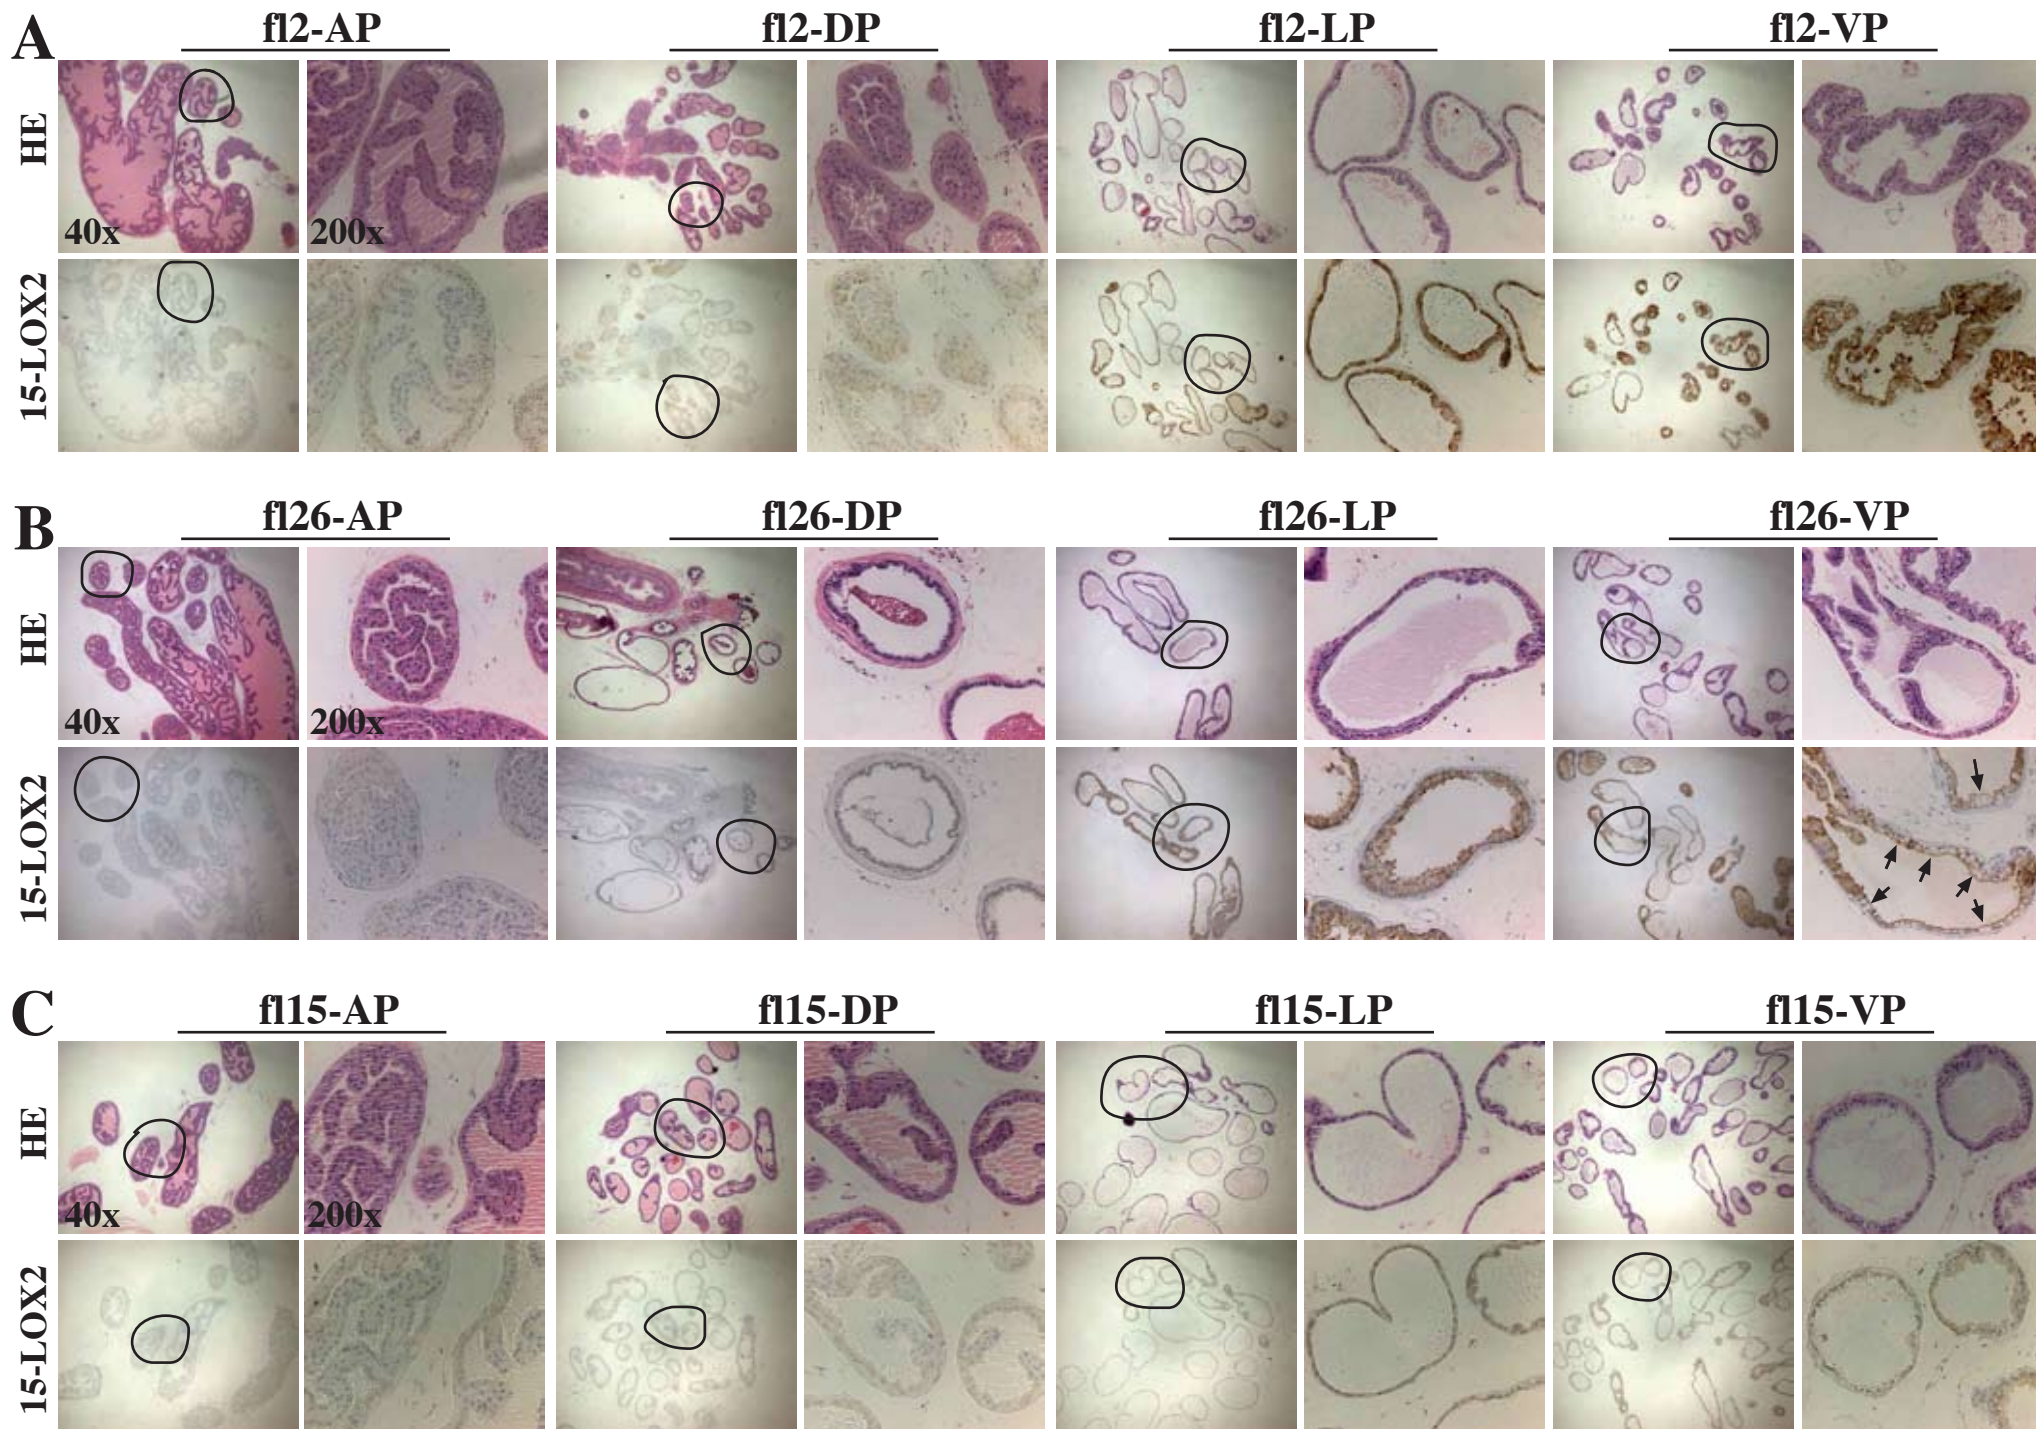

Supplement: NIHMS199837-supplement-FigS1.pdf [file NIHMS199837-supplement-FigS1.pdf]
